# Supplementary material for: Response of wild bee communities to beekeeping, urbanization, and flower availability
Source: Springer Nature journal article supplement (doi:10.1007/s11252-019-00909-y), 2019-11-07
Supplement: MOESM1 [file 17363468]

## Supplementary material

Fig. S1 Estimated species richness of 166 wild bee species captured in Montreal, QC in 2012 and 2013. Error bars denote 95% Bayesian credible intervals

Table S1 List of species for the community analysis sorted by phylogenetic order. These numbers identify species on the x axis of figures 2 -- 8

|  | **Species** |
| --- | --- |
| 1 | *Colletes simulans* Cresson, 1868 |
| 2 | *Hylaeus (Hylaeus) annulatus* (Linnaeus, 1758) |
| 3 | *Hylaeus (Hylaeus) communis* Nylander, 1852 |
| 4 | *Hylaeus (Hylaeus) leptocephalus* (Morawitz, 1871 [‘‘1870’’]) |
| 5 | *Hylaeus (Hylaeus) mesillae* (Cockerell, 1896) |
| 6 | *Hylaeus (Prosopis) affinis* (Smith, 1853) |
| 7 | *Hylaeus (Prosopis) modestus* Say, 1837 |
| 8 | *Hylaeus (Prosopis) nelumbonis* (Robertson, 1890) |
| 9 | *Hylaeus (Spatulariella) hyalinatus* Smith, 1842 |
| 10 | *Hylaeus (Spatulariella) punctatus* (Brullé, 1832) |
| 11 | *Augochloropsis (Paraugochloropsis) metallica* (Fabricius, 1793) |
| 12 | *Augochlorella aurata* (Smith, 1853) |
| 13 | *Augochlora (Augochlora) pura pura* (Say, 1837) |
| 14 | *Agapostemon (Agapostemon) texanus* Cresson, 1872 |
| 15 | *Agapostemon (Agapostemon) virescens* (Fabricius, 1775) |
| 16 | *Sphecodes carolinus* Mitchell, 1956 |
| 17 | *Sphecodes clematidis* Robertson, 1897 |
| 18 | *Sphecodes* *cressonii* (Robertson, 1903) |
| 19 | *Sphecodes dichrous* Smith, 1853 |
| 20 | *Sphecodes ranunculi* Robertson, 1897 |
| 21 | *Halictus (Odontalictus) ligatus* Say, 1837 |
| 22 | *Halictus (Protohalictus) rubicundus* (Christ, 1791) |
| 23 | *Halictus (Seladonia) confusus confusus* Smith, 1853 |
| 24 | *Lasioglossum (Dialictus) asteris* (Mitchell, 1960) |
| 25 | *Lasioglossum (Dialictus) cephalotes* (Dalla Torre, 1896) |
| 26 | *Lasioglossum (Dialictus) coeruleum* (Robertson, 1893) |
| 27 | *Lasioglossum (Dialictus) cressonii* (Robertson, 1890) |
| 28 | *Lasioglossum (Dialictus) dreisbachi* (Mitchell, 1960) |
| 29 | *Lasioglossum (Dialictus) ephialtum* Gibbs, 2010 |
| 30 | *Lasioglossum (Dialictus) heterognathum* (Mitchell, 1960) |
| 31 | *Lasioglossum (Dialictus) hitchensi* Gibbs, 2012 |
| 32 | Lasioglossum (Dialictus) imitatum (Smith, 1853) |
| 33 | Lasioglossum (Dialictus) laevissimum (Smith, 1853) |
| 34 | *Lasioglossum (Dialictus) leucocomum* (Lovell, 1908) |
| 35 | *Lasioglossum (Dialictus) lineatulum* (Crawford, 1906) |
| 36 | *Lasioglossum (Dialictus) michiganense* (Mitchell, 1960) |
| 37 | *Lasioglossum (Dialictus) nigroviride* (Graenicher, 1911) |
| 38 | *Lasioglossum (Dialictus) oblongum* (Lovell, 1905) |
| 39 | *Lasioglossum (Dialictus) paradmirandum* (Knerer & Atwood, 1966) |
| 40 | *Lasioglossum (Dialictus) pilosum* (Smith, 1853) |
| 41 | *Lasioglossum (Dialictus) planatum* (Lovell, 1905) |
| 42 | *Lasioglossum (Dialictus) sagax* (Sandhouse, 1924) |
| 43 | *Lasioglossum (Dialictus) smilacinae* (Robertson, 1897) |
| 44 | *Lasioglossum (Dialictus) tegulare* (Robertson, 1890) |
| 45 | *Lasioglossum (Dialictus) tenax* (Sandhouse, 1924) |
| 46 | *Lasioglossum (Dialictus) trigeminum* Gibbs, 2011 |
| 47 | *Lasioglossum (Dialictus) versans* (Lovell, 1905) |
| 48 | *Lasioglossum (Dialictus) versatum* (Robertson, 1902) |
| 49 | *Lasioglossum (Dialictus) viridatum* (Lovell, 1905) |
| 50 | *Lasioglossum (Dialictus) zephyrum* (Smith, 1853) |
| 51 | *Lasioglossum (Evylaeus) cinctipes* (Provancher, 1888) |
| 52 | *Lasioglossum (Hemihalictus) birkmanni* (Crawford, 1906) |
| 53 | *Lasioglossum (Hemihalictus) foxii* (Robertson, 1895) |
| 54 | *Lasioglossum (Hemihalictus) macoupinense* (Robertson, 1895) |
| 55 | *Lasioglossum (Lasioglossum) athabascense* (Sandhouse, 1933) |
| 56 | *Lasioglossum (Lasioglossum) coriaceum* (Smith, 1853) |
| 57 | *Lasioglossum (Leuchalictus) zonulum* (Smith, 1848) |
| 58 | *Lasioglossum (Leuchalictus) leucozonium* (Schrank, 1781) |
| 59 | *Lasioglossum (Sphecogastra) comagenense* (Knerer & Atwood, 1964) |
| 60 | *Lasioglossum (Sphecogastra) quebecense* (Crawford, 1907) |
| 61 | *Lasioglossum (Sphecogastra) oenotherae* (Stevens, 1920) |
| 62 | *Andrena (Andrena) clarkella* (Kirby, 1802) |
| 63 | *Andrena (Andrena) frigida* Smith, 1853 |
| 64 | *Andrena (Andrena) mandibularis* Robertson, 1892 |
| 65 | *Andrena (Andrena) milwaukeensis* Graenicher, 1903 |
| 66 | *Andrena (Andrena) rufosignata* Cockerell, 1902 |
| 67 | *Andrena (Cnemiandrena) chromotricha* Cockerell, 1899 |
| 68 | *Andrena (Cnemiandrena) hirticincta* Provancher, 1888 |
| 69 | *Andrena (Cnemiandrena) nubecula* Smith, 1853 |
| 70 | *Andrena (Euandrena) geranii* Robertson, 1891 |
| 71 | *Andrena (Gonandrena) integra* Smith, 1853 |
| 72 | *Andrena (Gonandrena) persimulata* Viereck, 1917 |
| 73 | *Andrena (Holandrena) cressonii cressonii* Robertson, 1891 |
| 74 | *Andrena (Larandrena) miserabilis* Cresson, 1872 |
| 75 | *Andrena (Leucandrena) erythronii* Robertson, 1891 |
| 76 | *Andrena (Melandrena) carlini* Cockerell, 1901 |
| 77 | *Andrena (Melandrena) commoda* Smith, 1879 |
| 78 | *Andrena (Melandrena)* *dunningi* Cockerell, 1898 |
| 79 | *Andrena (Melandrena) nivalis* Smith, 1853 |
| 80 | *Andrena (Melandrena) vicina* Smith, 1853 |
| 81 | *Andrena (Micrandrena) ziziae* Robertson, 1891 |
| 82 | *Andrena (Micrandrena) nigrae* Robertson, 1905 |
| 83 | *Andrena (Plastandrena) crataegi* Robertson, 1893 |
| 84 | *Andrena (Ptilandrena) distans* Provancher, 1888 |
| 85 | *Andrena (Ptilandrena) erigeniae* Robertson, 1891 |
| 86 | *Andrena (Rhacandrena) robertsonii* Dalla Torre, 1896 |
| 87 | *Andrena (Scrapteropsis) imitatrix* Cresson, 1872 |
| 88 | *Andrena (Scrapteropsis) morrisonella* Viereck, 1917 |
| 89 | *Andrena (Simandrena) nassonii* Robertson, 1895 |
| 90 | *Andrena (Simandrena) wheeleri* Graenicher, 1904 |
| 91 | *Andrena (Taeniandrena) wilkella* (Kirby, 1802) |
| 92 | *Andrena (Thysandrena) w-scripta* Viereck, 1904 |
| 93 | *Andrena (Thysandrena) bisalicis* Viereck, 1908 |
| 94 | *Andrena (Trachandrena) ceanothi* Viereck, 1917 |
| 95 | *Andrena (Trachandrena) forbesii* Robertson, 1895 |
| 96 | *Andrena (Trachandrena) hippotes* Robertson, 1895 |
| 97 | *Andrena (Trachandrena) rugosa* Robertson, 1891 |
| 98 | *Andrena (Trachandrena) sigmundi* Cockerell, 1902 |
| 99 | *Andrena (Trachandrena) spiraeana* Robertson, 1895 |
| 100 | *Andrena (Tylandrena) erythrogaster* (Ashmead, 1890) |
| 101 | *Andrena (Tylandrena) perplexa* Smith, 1853 |
| 102 | *Calliopsis (Calliopsis) andreniformis* Smith, 1853 |
| 103 | *Pseudopanurgus* *parvus* (Robertson, 1892) |
| 104 | *Anthidium (Anthidium)* *manicatum* Linnaeus, 1758 |
| 105 | *Anthidium (Anthidium) florentinum* Fabricius, 1775 |
| 106 | *Anthidium (Proantidium) oblongatum* (Illiger, 1806) |
| 107 | *Heriades (Neotrypetes) carinata* Cresson, 1864 |
| 108 | *Heriades (Neotrypetes) leavitti* Crawford, 1913 |
| 109 | *Hoplitis (Hoplitis) anthocopoides* Schenck, 1853 |
| 110 | *Hoplitis (Alcidamea) pilosifrons* (Cresson, 1864) |
| 111 | *Hoplitis (Alcidamea) producta producta* (Cresson, 1864) |
| 112 | *Hoplitis (Alcidamea) spoliata* (Provancher, 1888) |
| 113 | *Osmia (Diceratosmia) conjuncta* Cresson, 1864 |
| 114 | *Osmia (Melanosmia) albiventris* Cresson, 1864 |
| 115 | *Osmia (Melanosmia) atriventris* Cresson, 1864 |
| 116 | *Osmia (Melanosmia) pumila* Cresson, 1864 |
| 117 | *Osmia (Melanosmia) simillima* Smith, 1853 |
| 118 | *Osmia (Osmia) lignaria* Say, 1837 |
| 119 | *Osmia (Osmia) taurus* Smith, 1873 |
| 120 | *Chelostoma (Foveosmia) campanularum* (Kirby, 1802) |
| 121 | *Chelostoma (Gyrodromella) rapunculi* (Lepeletier, 1841) |
| 122 | *Chelostoma (Prochelostoma) philadelphi* (Robertson, 1891) |
| 123 | *Megachile (Chelostomoides) campanulae* (Robertson, 1903) |
| 124 | *Megachile (Eutricharaea) rotundata* (Fabricius, 1787) |
| 125 | *Megachile (Litomegachile) brevis* Say, 1837 |
| 126 | *Megachile (Litomegachile) mendica* Cresson, 1878 |
| 127 | *Megachile (Litomegachile) texana* Cresson, 1878 |
| 128 | *Megachile (Megachile) centuncularis* (Linnaeus, 1858) |
| 129 | *Megachile (Megachile) lapponica* Thomson, 1872 |
| 130 | *Megachile (Megachile) inermis* Provancher, 1888 |
| 131 | *Megachile (Megachile) relativa* Cresson, 1878 |
| 132 | *Megachile (Xanthosarus) frigida* Smith, 1853 |
| 133 | *Megachile (Xanthosarus) gemula* Cresson, 1878 |
| 134 | *Megachile (Xanthosarus) latimanus* Say, 1823 |
| 135 | *Megachile (Sayapis) pugnata* Say, 1837 |
| 136 | *Coelioxys (Boreocoelioxys) octodentata* Say, 1824 |
| 137 | *Coelioxys (Boreocoelioxys) porterae* Cockerell, 1900 |
| 138 | *Ceratina (Zadontomerus) calcarata* Robertson, 1900 |
| 139 | *Ceratina (Zadontomerus) dupla* Say, 1837 |
| 140 | *Ceratina (Zadontomerus) mikmaqi* Rehan & Sheffield, 2011 |
| 141 | *Nomada bethunei* Cockerell, 1903 |
| 142 | *Nomada cressonii* Robertson, 1893 |
| 143 | *Nomada denticulata* Robertson, 1902 |
| 144 | *Nomada luteoloides* Robertson, 1895 |
| 145 | *Nomada* *maculata* Cresson, 1863 |
| 146 | *Nomada pygmaea* Cresson, 1963 |
| 147 | *Nomada vicina* Cresson, 1863 |
| 148 | *Epeolus scutellaris* Say, 1824 |
| 149 | *Triepeolus pectoralis* (Robertson, 1897) |
| 150 | *Holcopasites calliopsidis* (Linsley, 1943) |
| 151 | *Mellisodes (Eumelissodes) druriella* (Kirby, 1802) |
| 152 | *Melissodes (Eumelissodes) subillata* LaBerge, 1961 |
| 153 | *Melissodes (Eumelissodes) illata* Lovell & Cockerell, 1906 |
| 154 | *Melissodes (Eumelissodes) trinodis* Robertson, 1901 |
| 155 | *Melissodes (Heliomelissodes) desponsa* Smith, 1854 |
| 156 | *Peponapis (Peponapis) pruinosa* (Say, 1837) |
| 157 | *Anthophora (Clisodon) terminalis* Cresson, 1869 |
| 158 | *Bombus (Bombus) terricola* Kirby, 1837 |
| 159 | *Bombus (Psithyrus) citrinus* (Smith, 1854) |
| 160 | *Bombus (Thoracobombus) fervidus* (Fabricius, 1798) |
| 161 | *Bombus (Cullumanobombus) rufocinctus* Cresson, 1863 |
| 162 | *Bombus (Cullumanobombus) griseocollis* (DeGeer, 1773) |
| 163 | *Bombus (Pyrobombus) bimaculatus* Cresson, 1863 |
| 164 | *Bombus (Pyrobombus) impatiens* Cresson, 1863 |
| 165 | *Bombus (Pyrobombus) vagans vagans* Smith, 1854 |
| 166 | *Apis (Apis) mellifera* Linnaeus, 1758 |

Table S2 Model selection based on QAICc of *N*-mixture models used to estimate the abundance of the common species captured in Montreal, QC in 2012 and 2013. Only models with ∆QAICc < 4 are shown for brevity. Note that explanatory variables on abundance are designated between parentheses in lambda(), whereas variables tested on detection probability are shown between parentheses in p(). Estimate of overdispersion (c-hat) is shown in parentheses for each species

|  | **K** | **QAICc** | **∆QAICc** | **QAICcWt** |
| --- | --- | --- | --- | --- |
| ***Hylaeus communis* (c-hat = 5.16)** |  |
| lambda(log area + floral diversity + floral cover + honey bee capture rate + heat island proportion + floral diversity X honey bee capture rate) p(sampling effort + Julian day + Julian day2 + pan trap color) | 14 | 455.91 | 0.00 | 0.64 |
| lambda(log area + floral diversity + floral cover + honey bee capture rate + heat island proportion + floral cover X honey bee capture rate) p(sampling effort + Julian day + Julian day2 + pan trap color) | 14 | 457.12 | 1.20 | 0.35 |
| ***Agapostemon virescens*** |  |  |  |  |
| lambda(log area + floral diversity + floral cover + honey bee capture rate + floral diversity X honey bee capture rate) p(sampling effort + Julian day + Julian day2 + pan trap color) | 14 | 618.45 | 0.00 | 0.25 |
| lambda(log area + floral diversity + floral cover + honey bee capture rate + floral diversity X honey bee capture rate) p(sampling effort + Julian day + pan trap color) | 13 | 618.63 | 0.18 | 0.23 |
| lambda(log area + floral diversity + floral cover + honey bee capture rate + heat island proportion + floral diversity X honey bee capture rate) p(sampling effort + Julian day + Julian day2 + pan trap color) | 15 | 619.66 | 1.22 | 0.13 |
| lambda(log area + floral diversity + floral cover + honey bee capture rate + heat island proportion + floral diversity X honey bee capture rate) p(sampling effort + Julian day + pan trap color) | 14 | 619.96 | 1.52 | 0.12 |
| lambda(log area + floral diversity + floral cover + honey bee capture rate + floral cover X honey bee capture rate) p(sampling effort + Julian day + pan trap color) | 13 | 620.02 | 1.57 | 0.11 |
| lambda(log area + floral diversity + floral cover + honey bee capture rate + floral cover X honey bee capture rate) p(sampling effort + Julian day + Julian day2 + pan trap color) | 14 | 620.28 | 1.83 | 0.10 |
| lambda(log area + floral diversity + floral cover + honey bee capture rate + heat island proportion + floral cover X honey bee capture rate) p(sampling effort + Julian day + pan trap color) | 14 | 622.24 | 3.79 | 0.04 |
| ***Ceratina calcarata* (c-hat = 3.49)** |  |  |  |  |
| lambda(log area + floral diversity + floral cover + honey bee capture rate + heat island proportion + floral cover X honey bee capture rate) p(sampling effort + Julian day + Julian day2 + pan trap color) | 15 | 413.49 | 0.00 | 0.92 |
| ***Hylaeus hyalinatus* (c-hat = 3.17)** |  |  |  |  |
| lambda(log area + floral diversity + floral cover + honey bee capture rate + heat island proportion + floral cover X honey bee capture rate) p(sampling effort + Julian day + Julian day2 + pan trap color) | 14 | 391.48 | 0.00 | 0.54 |
| lambda(log area + floral diversity + floral cover + honey bee capture rate + heat island proportion + floral diversity X honey bee capture rate) p(sampling effort + Julian day + Julian day2 + pan trap color) | 14 | 391.80 | 0.31 | 0.46 |
| ***Halictus ligatus* (c-hat = 3.67)** |  |  |  |  |
| lambda(log area + floral diversity + floral cover + honey bee capture rate + heat island proportion + floral diversity X honey bee capture rate) p(sampling effort + Julian day + pan trap color) | 13 | 531.45 | 0.00 | 0.26 |
| lambda(log area + floral diversity + floral cover + honey bee capture rate + floral cover X honey bee capture rate) p(sampling effort + Julian day + pan trap color) | 12 | 532.35 | 0.90 | 0.17 |
| lambda(log area + floral diversity + floral cover + honey bee capture rate + heat island proportion + floral cover X honey bee capture rate) p(sampling effort + Julian day + pan trap color) | 13 | 532.43 | 0.98 | 0.16 |
| lambda(log area + floral diversity + floral cover + honey bee capture rate + heat island proportion + floral diversity X honey bee capture rate) p(sampling effort + Julian day + Julian day2 + pan trap color) | 14 | 533.71 | 2.26 | 0.08 |
| lambda(log area + floral diversity + floral cover + honey bee capture rate) p(sampling effort + Julian day + pan trap color) | 11 | 533.87 | 2.42 | 0.08 |
| lambda(log area + floral diversity + floral cover + honey bee capture rate + floral cover X honey bee capture rate) p(sampling effort + Julian day + Julian day2 + pan trap color) | 13 | 534.57 | 3.12 | 0.05 |
| lambda(log area + floral diversity + floral cover + honey bee capture rate + heat island proportion + floral cover X honey bee capture rate) p(sampling effort + Julian day + Julian day2 + pan trap color) | 14 | 534.68 | 3.23 | 0.05 |
| lambda(log area + floral diversity + floral cover) p(sampling effort + Julian day + pan trap color) | 10 | 534.93 | 3.48 | 0.05 |
| lambda(log area + floral diversity + floral cover + honey bee capture rate + floral diversity X honey bee capture rate) p(sampling effort + Julian day + pan trap color) | 12 | 535.02 | 3.57 | 0.04 |
| ***Hoplitis producta* (c-hat = 4.61)** |  |  |  |  |
| lambda(log area + floral diversity + floral cover) p(sampling effort + Julian day + Julian day2 + pan trap color) | 12 | 358.11 | 0.00 | 0.42 |
| lambda(log area + floral diversity + floral cover + honey bee capture rate + heat island proportion + floral diversity X honey bee capture rate) p(sampling effort + Julian day + Julian day2 + pan trap color) | 15 | 359.76 | 1.65 | 0.18 |
| lambda(log area + floral diversity + floral cover + honey bee capture rate + heat island proportion + floral cover X honey bee capture rate) p(sampling effort + Julian day + Julian day2 + pan trap color) | 15 | 359.99 | 1.88 | 0.16 |
| lambda(log area + floral diversity + floral cover + honey bee capture rate) p(sampling effort + Julian day + Julian day2 + pan trap color) | 13 | 360.23 | 2.12 | 0.14 |
| ***Lasioglossum coriaceum* (c-hat = 2.03)** |  |  |  |  |
| lambda(log area + honey bee capture rate) p(sampling effort + Julian day + Julian day2 + pan trap color) | 10 | 346.54 | 0.00 | 0.70 |
| lambda(log area + floral diversity + floral cover + honey bee capture rate) p(sampling effort + Julian day + Julian day2 + pan trap color) | 12 | 350.47 | 3.92 | 0.10 |
| ***Lasioglossum imitatum* (c-hat = 4.34)** |  |  |  |  |
| lambda(log area + floral diversity + floral cover) p(sampling effort + Julian day + Julian day2 + pan trap color) | 11 | 630.71 | 0.00 | 0.31 |
| lambda(log area + floral diversity + floral cover) p(sampling effort + Julian day + pan trap color) | 10 | 631.06 | 0.35 | 0.26 |
| lambda(log area + floral diversity + floral cover + honey bee capture rate) p(sampling effort + Julian day + Julian day2 + pan trap color) | 12 | 632.79 | 2.08 | 0.11 |
| lambda(log area + floral diversity + floral cover + honey bee capture rate) p(sampling effort + Julian day + pan trap color) | 11 | 632.96 | 2.24 | 0.10 |
| ***Lasioglossum laevissimum* (c-hat = 7.70)** |  |  |  |  |
| lambda(log area + floral diversity + floral cover + honey bee capture rate + heat island proportion + floral diversity X honey bee capture rate) p(sampling effort + Julian day + Julian day2 + pan trap color) | 15 | 885.38 | 0.00 | 1.00 |
| ***Lasioglossum sagax* (c-hat = 5.39)** |  |  |  |  |
| lambda(log area + floral diversity + floral cover + honey bee capture rate + heat island proportion + floral diversity X honey bee capture rate) p(sampling effort + Julian day + Julian day2 + pan trap color) | 15 | 348.53 | 0.00 | 0.35 |
| lambda(log area + floral diversity + floral cover + honey bee capture rate + heat island proportion + floral diversity X honey bee capture rate) p(sampling effort + Julian day + pan trap color) | 14 | 349.76 | 1.23 | 0.19 |
| lambda(log area + floral diversity + floral cover + honey bee capture rate + floral diversity X honey bee capture rate) p(sampling effort + Julian day + Julian day2 + pan trap color) | 14 | 350.20 | 1.67 | 0.15 |
| lambda(log area + floral diversity + floral cover + honey bee capture rate + floral diversity X honey bee capture rate) p(sampling effort + Julian day + pan trap color) | 13 | 350.59 | 2.06 | 0.13 |
| lambda(log area + floral diversity + floral cover + honey bee capture rate + heat island proportion + floral cover X honey bee capture rate) p(sampling effort + Julian day + Julian day2 + pan trap color) | 15 | 351.38 | 2.85 | 0.08 |
| lambda(log area + floral diversity + floral cover + honey bee capture rate + heat island proportion + floral cover X honey bee capture rate) p(sampling effort + Julian day + pan trap color) | 14 | 351.80 | 3.26 | 0.07 |
| ***Lasioglossum versatum* (c-hat = 4.11)** |  |  |  |  |
| lambda(log area + floral diversity + floral cover + honey bee capture rate + heat island proportion + floral diversity X honey bee capture rate) p(sampling effort + Julian day + pan trap color) | 13 | 368.42 | 0.00 | 0.61 |
| lambda(log area + floral diversity + floral cover + honey bee capture rate + heat island proportion + floral diversity X honey bee capture rate) p(sampling effort + Julian day + Julian day2 + pan trap color) | 14 | 370.28 | 1.86 | 0.24 |
| lambda(log area + floral diversity + floral cover + honey bee capture rate + floral diversity X honey bee capture rate) p(sampling effort + Julian day + pan trap color) | 12 | 371.95 | 3.54 | 0.11 |

Table S3 Model-averaged estimates and 95% confidence intervals of parameters on abundance of common species captured in Montreal, QC in 2012 and 2013. Only estimates for which 95% confidence interval excludes 0 are shown

| **Parameter** | **Species** | **Model-averaged estimate*** | **95% CI** |
| --- | --- | --- | --- |
| Floral diversity | *H. hyalinatus* | 0.84 | [0.02, 1.67] |
| Floral diversity | *H. producta* | 0.82 | [0.08, 1.57] |
| Heat island proportion | *H. communis* | 0.6 | [0.31, 0.9] |
| Heat island proportion | *H. hyalinatus* | 1.00 | [0.66, 1.35] |
| Heat island proportion | *L. laevissimum* | 0.66 | [0.48, 0.84] |
| Heat island proportion | *C. calcarata* | -0.92 | [-1.47, -0.37] |
| Floral diversity x honey bee capture rate interaction | *L. laevissimum* | -0.54 | [-0.79, -0.29] |
| Floral diversity x honey bee capture rate interaction | *L. versatum* | -0.90 | [-1.34, -0.45] |
| log area | *H. communis* | 0.77 | [0.17, 1.38] |
| log area | *H. ligatus* | 0.82 | [0.19, 1.44] |
| log area | *L. imitatum* | 0.62 | [0.25, 1] |
| log area | *L. laevissimum* | 0.90 | [0.55, 1.25] |
| log area | *L. coriaceum* | 1.14 | [0.66, 1.61] |

*shrinkage estimator used for main effects of variables not involved in interactions, model-averaged effect size for unit change of 1 reported otherwise.

Table S4 Model-averaged estimates and 95% confidence intervals of parameters on detection probability of 11 common species captured in Montreal, QC in 2012 and 2013. Only estimates for which 95% confidence interval excludes 0 are shown

| **Parameter** | **Species** | **Model-averaged estimate** | **95% CI** |
| --- | --- | --- | --- |
| Julian day squared | *H. hyalinatus* | -0.85 | [-1.21, -0.5] |
| Julian day squared | *H. communis* | -0.62 | [-0.97, -0.26] |
| Julian day squared | *L. laevissimum* | -0.30 | [-0.45, -0.16] |
| Julian day squared | *L. coriaceum* | 0.91 | [0.34, 1.47] |
| Julian day squared | *H. producta* | -4.59 | [-6.02, -3.17] |
| Julian day squared | *C. calcarata* | 0.52 | [0.28, 0.75] |
| Sampling effort | *H. hyalinatus* | 1.99 | [1.37, 2.61] |
| Sampling effort | *L. laevissimum* | 0.92 | [0.65, 1.19] |
| Sampling effort | *L. sagax* | 1.28 | [0.51, 2.05] |
| Sampling effort | *H. producta* | 0.83 | [0.4, 1.26] |
| White vs blue bowls | *H. hyalinatus* | 1.34 | [0.6, 2.08] |
| White vs blue bowls | *A. virescens* | -0.92 | [-1.3, -0.54] |
| White vs blue bowls | *L. imitatum* | 0.96 | [0.51, 1.4] |
| White vs blue bowls | *L. laevissimum* | 0.63 | [0.35, 0.9] |
| White vs blue bowls | *L. coriaceum* | -0.75 | [-1.46, -0.04] |
| White vs blue bowls | *H. producta* | 0.43 | [0.05, 0.82] |
| Yellow vs blue bowls | *H. hyalinatus* | 1.69 | [0.97, 2.41] |
| Yellow vs blue bowls | *A. virescens* | -0.52 | [-0.86, -0.17] |
| Yellow vs blue bowls | *H. ligatus* | 0.51 | [0.06, 0.95] |
| Yellow vs blue bowls | *L. imitatum* | 1.21 | [0.77, 1.65] |
| Yellow vs blue bowls | *L. laevissimum* | 1.02 | [0.75, 1.28] |
| Yellow vs blue bowls | *L. sagax* | 1.31 | [0.79, 1.84] |
| Yellow vs blue bowls | *L. versatum* | 1.16 | [0.52, 1.8] |
| Yellow vs blue bowls | *H. producta* | -0.50 | [-0.97, -0.03] |
